# Supplementary material
Source: PubMed Central journal article supplement (PMC5423654)
Supplement: NIHMS865468-supplement-Supporting_Information.pdf [file NIHMS865468-supplement-Supporting_Information.pdf]

## SUPPLEMENTAL MATERIAL

*Staphylococcus aureus* *sqr* encodes a type II sulfide:quinone oxidoreductase and impacts reactive sulfur speciation in cells

Shen *et al.*

This file contains **Supplementary Figures S1-S7**.

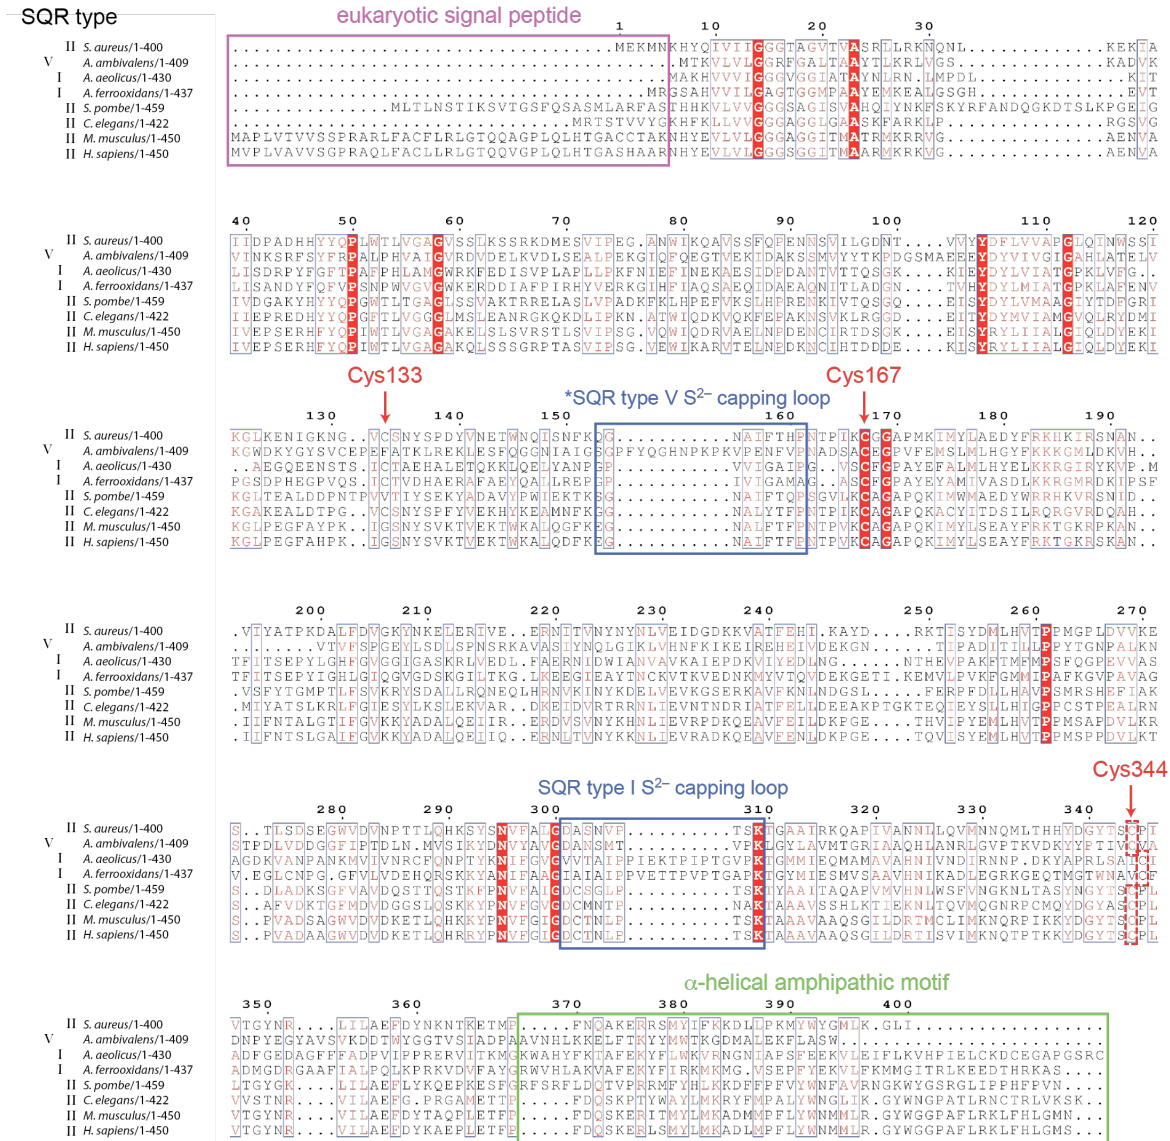

**Supplementary Figure S1.** Structure-based sequence alignment of *S. aureus* SQR with other biochemically or structurally characterized sulfide:quinone oxidoreductases. The amino acid sequence alignment includes SQR from *S. aureus* strain Newman (NWMN\_0029) (*top* entry), the subject of the work presented here, three structurally characterized SQRs from *A. ambivalens* (PDB: 3H8I or 3H8L),<sup>1</sup> *A. aeolicus* (PDB: 3HYV)<sup>2</sup> and *A. ferrooxidans* (PDB: 3T2Z), as well as

predicted or biochemically studied SQRs from eukaryotic organisms (*S. pombe*, *C. elegans*, *M. musculus* and *H. sapiens*). The SQR type (types I-VI) based on a recently reported classification is indicated to the left of each sequence.<sup>3</sup> *Red arrows* mark the positions of the three cysteine residues that correspond to C133, C167 and C344 in *S. aureus* SQR. *Pink box* marks the mitochondrial localization signal. The *blue boxes* mark the two insertion sites which incorporate what have been designated as sulfide (S<sup>2-</sup>) capping loops in the type V and type I SQRs, respectively, from the N-terminus. As can be seen, *S. aureus* SQR is classified as a type II SQR and lacks both sulfide capping loops, as well as all previously characterized functionally important features of a type I SQR enzyme.<sup>3</sup> Type II SQRs resemble most closely flavocytochrome c:sulfide dehydrogenases (FCSD), which has been structurally characterized in *Allochrodatum vinosum*<sup>4</sup> (see Fig. 1, main text); note that there is no clearly defined functional role established for the cysteine corresponding to C133 in the type II enzymes.<sup>5</sup> The other two Cys, C167 and C344, form the disulfide bond (see text for details). The *light green box* marks the C-terminal amphipathic helical motif which mediates the interaction between SQR protomer in oligomeric enzymes and/or electron acceptor quinone in the membrane. This structure-based alignment was generated in Jalview utilizing Clustal algorithm as default and rendered using ESPrnt 3.<sup>6</sup>

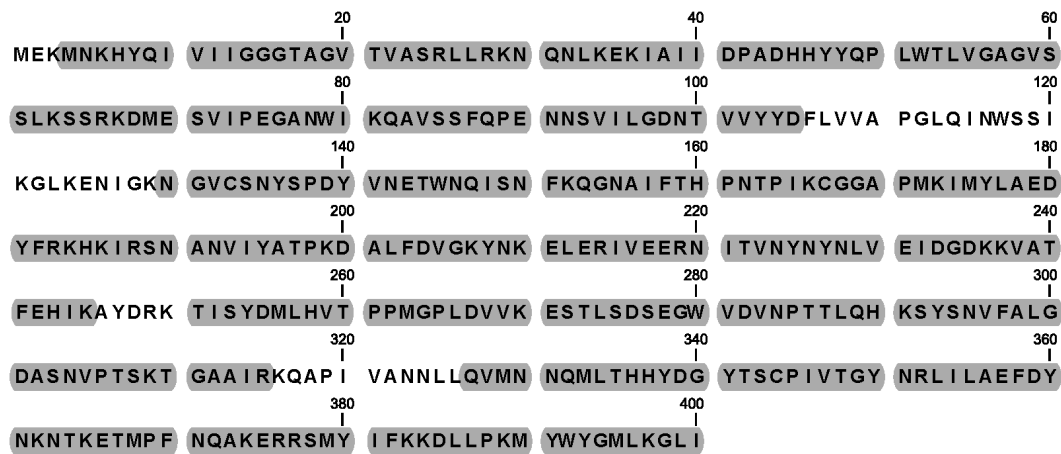

**Supplementary Figure S2.** Sequence coverage of purified SQR identified by MALDI-MS analysis. Purified SQR protein was proteolytically digested in solution separately by sequencing grade endonucleases (trypsin, Glu-C, Lys-C, Chymotrypsin and Asp-N), with produced peptides enriched by C18 ziptip and analyzed by MALDI-mass spectrometry. Identified peptides are shaded in *grey* and revealing 89.2% (357 of 400 residues over residues 4-400) sequence coverage.

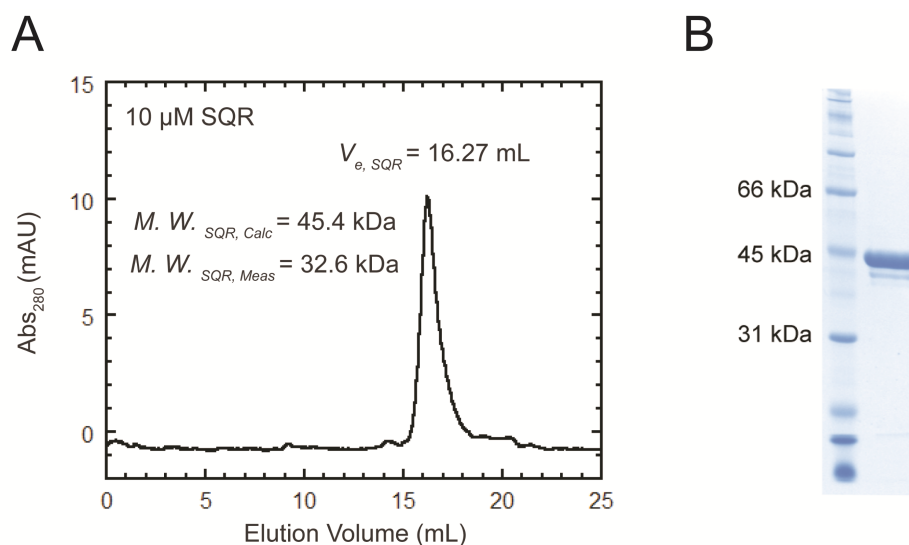

**Supplementary Figure S3.** Gel filtration profile and SDS-PAGE analysis for wild-type SQR. (A) The gel filtration profile of purified wild-type SQR ( $V_e = 16.27$  mL) was obtained from a Superdex-200 Increase gel filtration column. The standards used for calibration of Superdex-200 Increase gel filtration column were ovalbumin (44 kDa), conalbumin (75 kDa), aldolase (158 kDa), ferritin (440 kDa) and thyroglobulin (669 kDa). Buffer condition: 25 mM Tris-HCl, 500 mM NaCl, 2 mM TCEP, 10% glycerol, pH 8.0. (B) 2  $\mu$ g of purified wild-type SQR analyzed on a 15% SDS-PAGE on the right of broad range molecular weight standards.

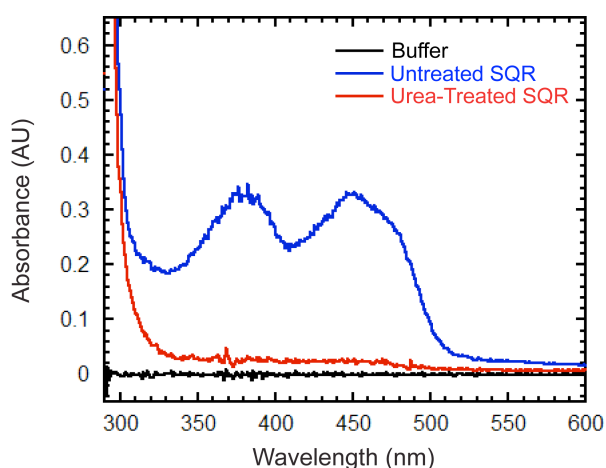

**Supplementary Figure S4.** Absorption spectra of untreated SQR and urea-treated SQR (50  $\mu$ M protomer). The *black trace* is for SQR buffer without reducing reagent: 25 mM Tris-HCl, 500 mM NaCl, 10% glycerol, pH 8.0. The *blue trace* is for untreated SQR and the *red trace* is for urea-treated SQR.

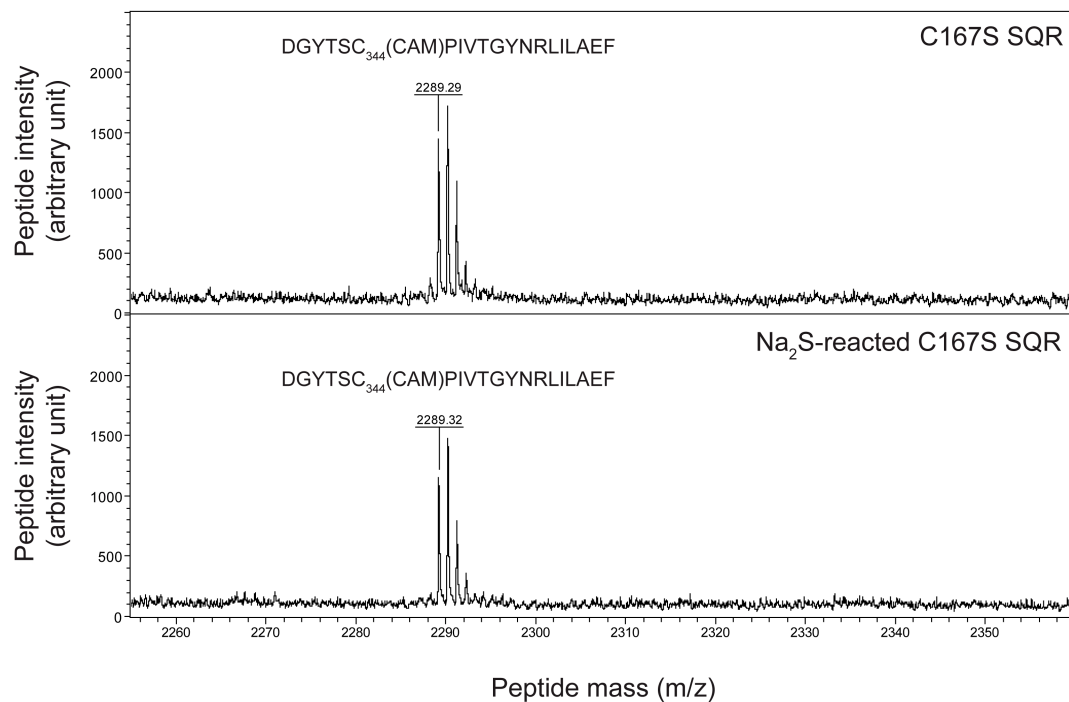

**Supplementary Figure S5.** MALDI mass spectrometry analysis reveals no derivatization of the peak for Cys344-containing peptide from Na<sub>2</sub>S-reacted C167S SQR in the absence of electron or S<sup>0</sup> acceptors. The unreacted C167S SQR (*upper panel*) and Na<sub>2</sub>S-reacted C167S SQR (*bottom panel*) were alkylated with iodoacetamide, proteolytically digested by Asp-N and analyzed by MALDI mass spectrometry. Cys344-containing peptide displays a mass of 2289.29 Da and 2389.32 Da after reacting with Na<sub>2</sub>S, with no detectable derivatized peak found.

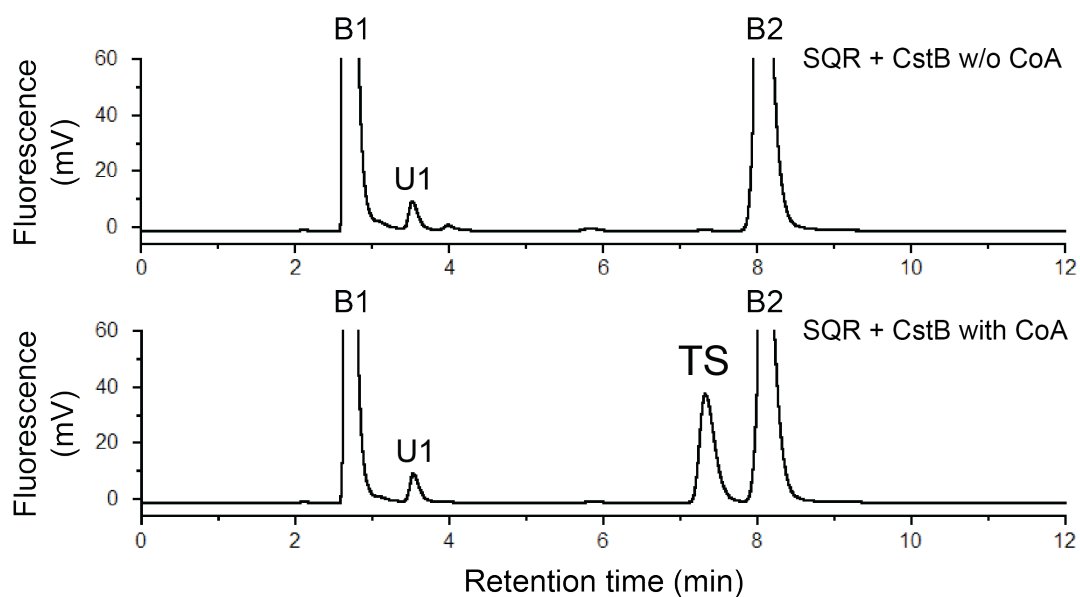

**Supplementary Figure S6.** Representative LC-based assay used to measure the catalytic thiosulfate (TS) production with sulfide as substrate in the absence of CoA (*top trace*) and the presence of 400  $\mu$ M CoA (*bottom trace*) at  $t=2$  min by 2  $\mu$ M SQR + CstB. Note that B1 and B2 peaks are from the labeling buffer and U1 peak is unidentified species which does not originate with the labeling buffer.<sup>7</sup> A peak (TS) corresponding to thiosulfate was only observed in the presence of CoA.

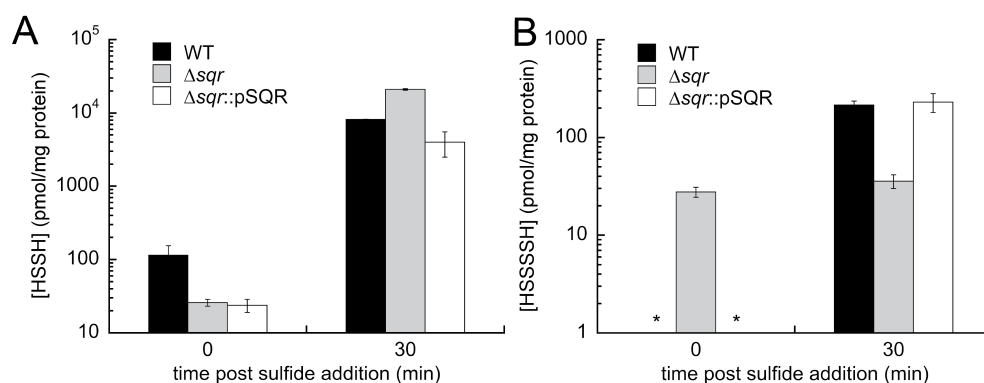

**Supplementary Figure S7.** Cellular inorganic polysulfide species profiling of the *S. aureus* strain Newman wild-type (WT),  $\Delta sqr$  and  $\Delta sqr::pSQR$  strains before ( $t=0$ ) and after ( $t=30$  min) addition of 0.2 mM  $\text{Na}_2\text{S}$  added to mid-log ( $\text{OD}_{600}\approx 0.2$ ) cultures. (A) hydrodisulfide (HSSH), also denoted generically as  $\text{S}_2^{2-}$  (main text); and (B) hydrotetrasulfide (HSSSSH), also denoted as  $\text{S}_4^{2-}$  (main text) presented in units of pmol per mg total protein. \*, n.d., not detected (below the detection limit of 1 pmol per mg protein).

## Supplementary References

- (1) Brito, J. A., Sousa, F. L., Stelter, M., Bandejas, T. M., Vonnheim, C., Teixeira, M., Pereira, M. M., Archer, M. (2009) Structural and functional insights into sulfide:quinone oxidoreductase. *Biochemistry* 48, 5613-5622.
- (2) Marcia, M., Ermler, U., Peng, G., Michel, H. (2009) The structure of Aquifex aeolicus sulfide:quinone oxidoreductase, a basis to understand sulfide detoxification and respiration. *Proc Natl Acad Sci U S A* 106, 9625-9630.
- (3) Marcia, M., Ermler, U., Peng, G., Michel, H. (2010) A new structure-based classification of sulfide:quinone oxidoreductases. *Proteins* 78, 1073-1083.
- (4) Chen, Z. W., Koh, M., Van Driessche, G., Van Beeumen, J. J., Bartsch, R. G., Meyer, T. E., Cusanovich, M. A., Mathews, F. S. (1994) The structure of flavocytochrome c sulfide dehydrogenase from a purple phototrophic bacterium. *Science* 266, 430-432.
- (5) Mishanina, T. V., Yadav, P. K., Ballou, D. P., Banerjee, R. (2015) Transient kinetic analysis of hydrogen sulfide oxidation catalyzed by human sulfide quinone oxidoreductase. *J Biol Chem* 290, 25072-25080.
- (6) Robert, X., Gouet, P. (2014) Deciphering key features in protein structures with the new ENDscript server. *Nucleic Acids Res* 42, W320-324.
- (7) Shen, J., Keithly, M. E., Armstrong, R. N., Higgins, K. A., Edmonds, K. A., Giedroc, D. P. (2015) *Staphylococcus aureus* CstB Is a novel multidomain persulfide dioxygenase-sulfurtransferase involved in hydrogen sulfide detoxification. *Biochemistry* 54, 4542-4554.
